# Supplementary material for: Elucidating a Key Anti-HIV-1 and Cancer-Associated Axis: The Structure of CCL5 (Rantes) in Complex with CCR5
Source: PubMed Central journal article supplement — Sci Rep. 2014 Jun 26;4:5447. doi: 10.1038/srep05447 (PMC4894430; doi:10.1038/srep05447), 2014-06-26
Supplement: srep05447-s1.pdf [file srep05447-s1.pdf]

## **Supplementary Information**

### **Elucidating a Key Anti-HIV-1 and Cancer-Associated Axis: The Structure of CCL5 (Rantes) in Complex with CCR5**

Phanourios Tamamis and Christodoulos A. Floudas\*

Department of Chemical and Biological Engineering, Princeton University, NJ, USA

**\*Corresponding Author:** Christodoulos A. Floudas

Department of Chemical and Biological Engineering, Princeton University, Princeton, NJ, 08544

Phone: 609-258-4595; Fax: 609-258-0211; email: [floudas@titan.princeton.edu](mailto:floudas@titan.princeton.edu)

### *Supplementary Discussion*

Schnur *et al.*<sup>1</sup> have recently biosynthesized a soluble CCR5 ectodomain composed of unsulfated N-terminal CCR5 domain, extracellular loop 1 and 2 and synthesized chimeric peptides containing disulfated-N-terminal CCR5 domain conjugates with extracellular loops 1 and 3, as well as, a conjugate of extracellular loops 1 and 2. These peptides, together with N-terminal CCR5 domain as a control, were used to map the interactions of between the N-terminal and extracellular domains of CCR5 with CCL5. Also in a previous study, Schnur *et al.*<sup>2</sup> used NMR studies to derive a conformation for the 7-23 residue fragment of the CCR5 N-terminal domain.

In our study, we used the conformation derived in the previous study of Schnur *et al.*<sup>2</sup> to model the complete CCR5 structure, the validity of which is demonstrated by the exceptional agreement with experimental findings, in the investigation of the entire CCR5, in complex with (i) a dual tropic HIV-1 gp120 V3 loop<sup>3</sup>, and (ii) CCL5 (present study). In addition, the computationally derived structure of this study, which utilized NMR conformations of CCL5<sup>4,5</sup>, depicts that the N-terminal domain of CCL5 forms crucial interactions with the CCR5 transmembrane domain, in line with experiments<sup>6,7,8,9,10,11</sup>. Within the simulation, the C-terminal 56-68 residue domain of CCL5 is not proximal to the CCR5 N-terminal domain and extracellular loops of CCR5; the distance of CCL5 Met67 C $\alpha$  – CCR5 Pro19 C $\alpha$ , which is the closest CCR5 residue from CCL5 residue Met67, is within 19-21 Å. Combining (i) the knowledge gained from previous experimental findings investigating the entire chemokine and chemokine receptor complex (showing that the N-terminal domain of CCL5 penetrates into the transmembrane region of CCR5), as well as the computationally derived structure derived here, and (ii) the experimental evidence for the high structural integrity of both the CCR5 transmembrane domain<sup>12</sup> and the region of CCL5 outside the N-terminal domain<sup>5</sup>, our study suggests that it is structurally-geometrically infeasible for CCL5 residues Met67 and Ser68 to interact with CCR5 (when CCL5 binds to the entire CCR5). CCL5 residues Met67 and Ser68 were affected by the binding to CCR5 constructs composed only by the (i) N-terminal domain – extracellular loop 1 – extracellular loop 2, and (ii) extracellular loop 1 – extracellular loop 2<sup>1</sup>.

The similarity between (i) the important CCL5 residues in residue moiety 12-50 which according to our study they mainly interact with the N-terminal domain of CCR5, and (ii) the CCL5

residues which according to Schnur *et al.*<sup>1</sup> are affected owing to the CCL5 binding to the N-terminal domain of CCR5 only, suggests that CCL5 in<sup>1</sup> could presumably have acquired a more proper binding and relative orientation with regard to the N-terminal domain, in the presence of the N-terminal domain only, compared to the experimental assays where extracellular loops were present. As the present study, as well as previous experiments<sup>6,7,8,9,10,11</sup>, provide evidence on the crucial role of the CCR5 transmembrane domain in binding and signaling, it is possible that its absence<sup>1</sup> – specifically in the experimental assays which included extracellular loops 1 and 2 – has affected negatively the correct binding and relative orientation of CCL5 with regard to the chimeric peptides.

### Supplementary Methods

*Analysis of Complex 14A:* We analyzed the intermolecular interaction free energies between CCL5 and CCR5 residue pairs of the simulation snapshots in Complex 14A using Supplementary Equation (1):

$$\Delta G_{RR'}^{\text{inte}} = \underbrace{\sum_{i \in R} \sum_{j \in R'} \left( E_{ij}^{\text{Coul}} + E_{ij}^{\text{GB}} \right)}_{\Delta G_{RR'}^{\text{polar}}} + \underbrace{\sum_{i \in R} \sum_{j \in R'} E_{ij}^{\text{vdW}} + \sigma \sum_{i \in R, R'} \Delta S_i}_{\Delta G_{RR'}^{\text{non polar}}} \quad (\text{Supplementary Equation 1})$$

The first and second group of terms on the right-hand side of Supplementary Equation 1 describe, respectively, polar and non-polar interactions between R and R'. A similar methodology for the analysis of interacting residues has been used for the elucidation of the molecular recognition of CXCR4 CCR5 by a dual tropic V3 loop<sup>3,13</sup>, the molecular recognition of CXCR4 by CXCL12<sup>14</sup>, the delineation of problems related to species specificity of proteins<sup>15</sup>, the design of transgenic proteins<sup>16</sup>, and in problems related to drug design<sup>17,18,19</sup>. In the calculations, R corresponds to a CCL5 residue and R' to a CCR5 residue. To compute the GB term in Supplementary Equation (1), we included all atoms and set the charges of atoms outside the two – under investigation – residues R and R' to zero. The last term contains the difference in solvent accessible surface areas of residues R and R' in the complex and unbound states. The generalized-Born energies and the atomic accessible-surface areas ( $\Delta S_i$ ) entering in Supplementary Equation 1 depend on the location of R and R' in the complex. The polar component contains a Coulombic term and a GB contribution, modeling the interaction between residue R and the solvent polarization potential induced by R' (or vice versa). Similarly, the non-polar component contains a van der Waals interaction between R, R' and a surface term, expressing cavity contributions and nonpolar interactions with the surrounding solvent. The non-polar and polar solvation terms were calculated using the heterogeneous water-membrane-water GBSW<sup>20</sup> using the same parameters as in<sup>3,13</sup>. The sum of the two components, polar and non-polar, reflects the total direct interaction between R and R' in the solvated complex. Subsequently, we decomposed the polar and non-polar interaction free energy contributions and present the results of the average intermolecular interaction free energies of the lowest binding free energy complex in two dimensional density maps in Supplementary Figure 1. In addition, we summed up the total intermolecular interaction free energies of every CCR5 residue, so as to provide insights into the role of each interacting CCR5 residue with CCL5 (first column per CCR5 residue in Figure 3), and the results are

presented in Figure 3. Also, in Figure 3, we provide a comparison to the sum of intermolecular interaction free energies summed up for every CCR5 residue with regard to the HIV-1 gp120 V3 loop binding (second column per CCR5 residue in Figure 3) using data from Tamamis and Floudas<sup>3</sup>.

*CCR5 Interacting Residues in Complex with CCL5 versus HIV-1 gp120 V3 loop:*

We summed up the residue pair-wise interaction free energies for every CCR5 residue in complex with (i) CCL5 (first column of Figure 3 per CCR5 residue) and (ii) the dual tropic HIV-1 gp120 V3 loop of<sup>3</sup> (second column of Figure 3 per CCR5 residue). Figure 3 presents the total interaction free energies of CCR5 residues which possess at least -4.5 kcal/mol total interaction free energy in at least one of the two complexes (i) or (ii), and is partitioned in panels (A) and (B). If a CCR5 residue interacts strongly and approximately equally with both CCL5 and the HIV-1 gp120 V3 loop, it is listed in panel A, whereas, if a CCR5 interacts strongly with CCL5 and weakly with the HIV-1 gp120 V3 loop, or vice versa, it is listed in panel B. To quantify if a j-th ( $j \in 1,352$ ) CCR5 residue interacts strongly with both CCL5 and the HIV-1 gp120 V3 loop (e.g. it belongs to panel A), we used the expression in Supplementary Equation (2) as a criterion:

$$\frac{\left| \sum_{q=1}^{N(\text{residues of CCL5})} \Delta G_{q,j}^{\text{inte}} - \sum_{p=1}^{M(\text{residues of HIV-1 gp120 V3 Loop})} \Delta G_{p,j}^{\text{inte}} \right|}{\min \left( \sum_{q=1}^{N(\text{residues of CCL5})} \Delta G_{q,j}^{\text{inte}}, \sum_{p=1}^{M(\text{residues of HIV-1 gp120 V3 Loop})} \Delta G_{p,j}^{\text{inte}} \right)} < 0.75 \quad (\text{Supplementary Equation 2}),$$

where  $\Delta G_{i,j}^{\text{inte}}$  in Supplementary Equation (2) denotes the interaction free energy between residue j of CCR5 and any interacting residue i of either CCL5 ( $i=q$  in Eq(1)) or the HIV-1 gp120 V3 loop ( $i=p$  in Supplementary Equation (2)). For any values greater or equal than 0.75, the CCR5 residue is listed in panel B. Based on the results, the choice of 0.75 proved to be appropriate for categorizing CCR5 residues into panels A and B. The first term in the numerator represents the interaction free energy of CCL5 residue “q” summed up for all possible interacting CCR5 residues “j”. The second term in the numerator represents the interaction free energy of HIV-1 gp120 V3 loop residue “p” summed up for all possible interacting CCR5 residues “j”. The denominator represents the absolute minimum value of the aforementioned terms in the numerator.

Supplementary Figures

Supplementary Figure 1

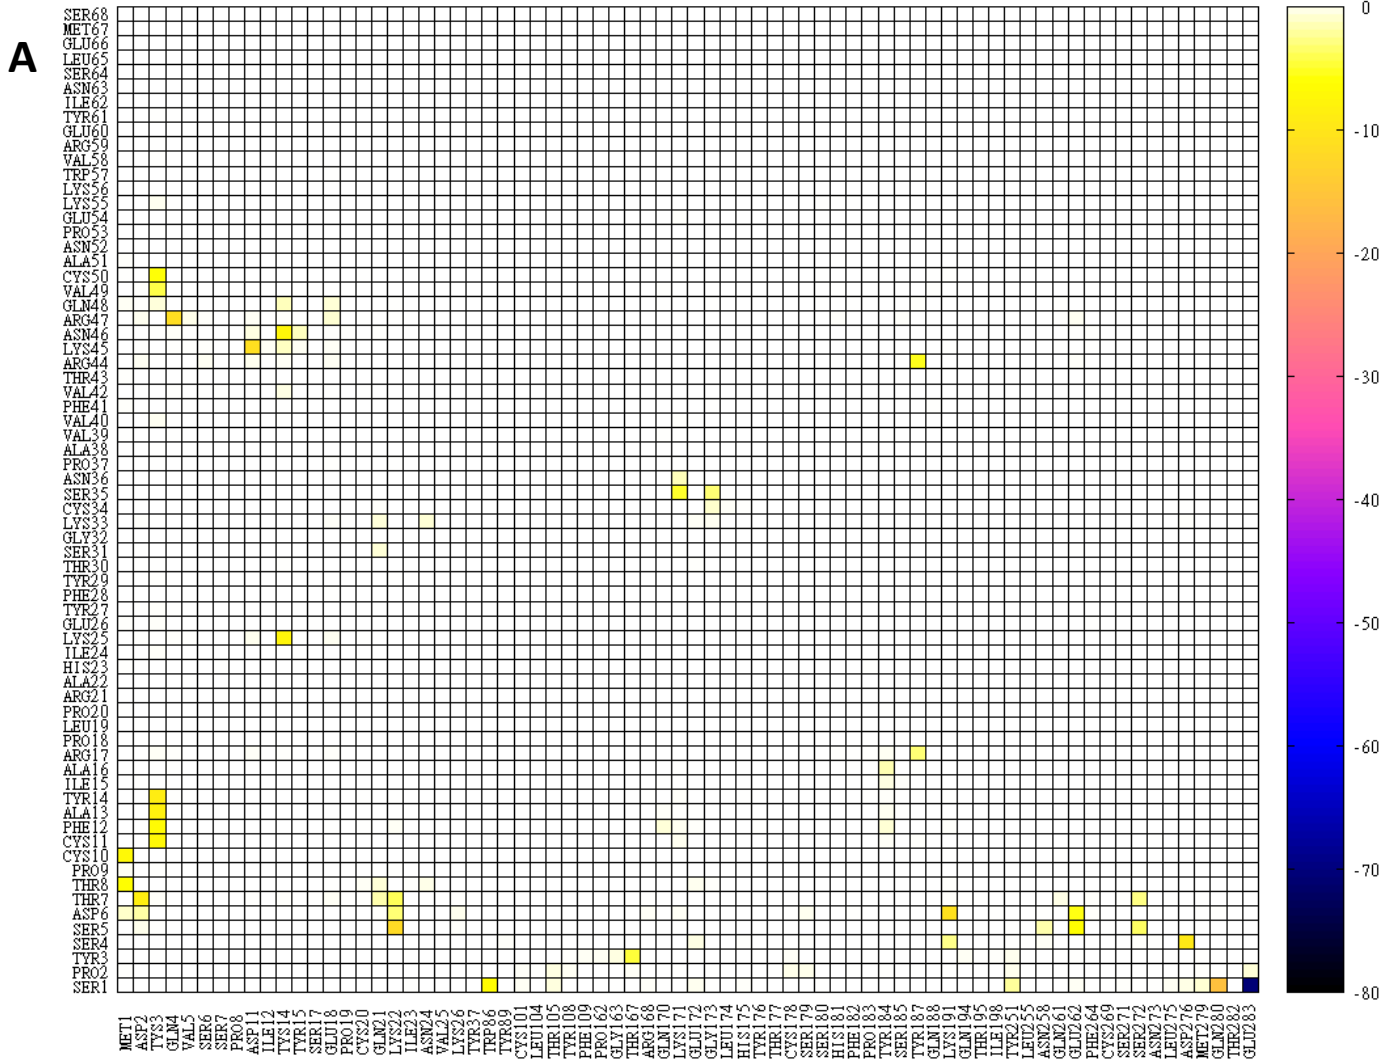

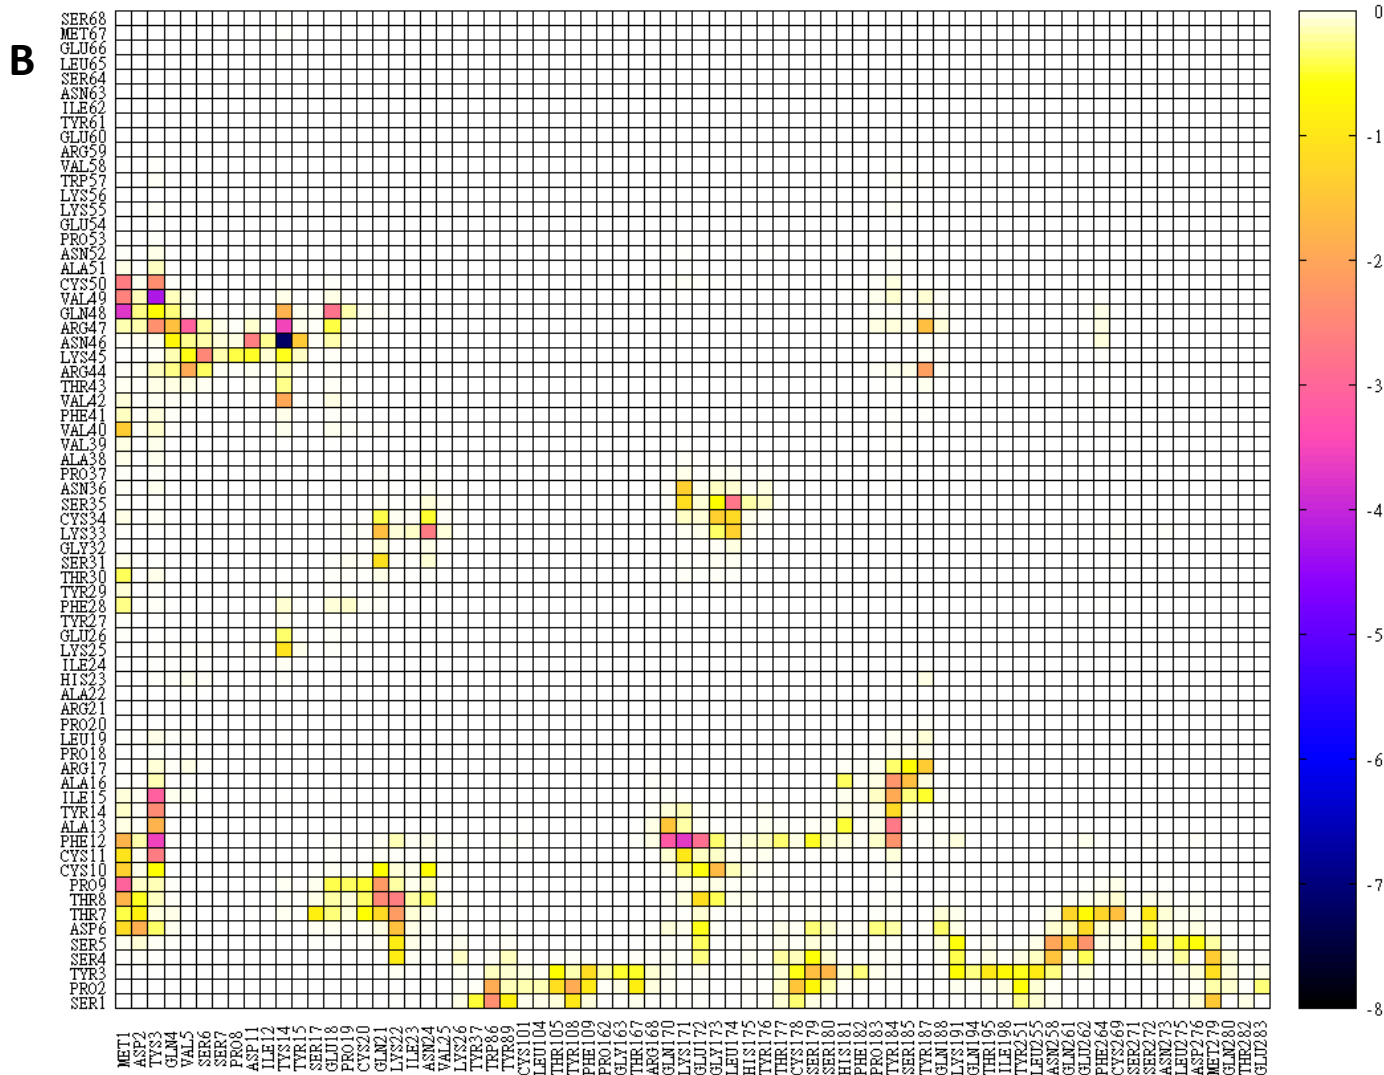

**Supplementary Figure 1:** Two dimensional density maps depicting the favorable (negative) average MM GBSA interaction free-energies for intermolecular CCL5 (y axis) : CCR5 (x axis) interacting residue pairs, within the simulation of the complex with the lowest average binding free energy. Panels (A) and (B) correspond to polar and non-polar interactions, respectively. All energies are in kcal/mol. The color – interaction free energy correspondence is shown by the palette on the right-hand side of each panel. All values have been computed by analysis of 1000 snapshots, extracted from the 20-ns simulation (of Complex 14A), at 20-ps intervals. Residue name “Tys” corresponds to a sulfated tyrosine.

## Supplementary Figure 2

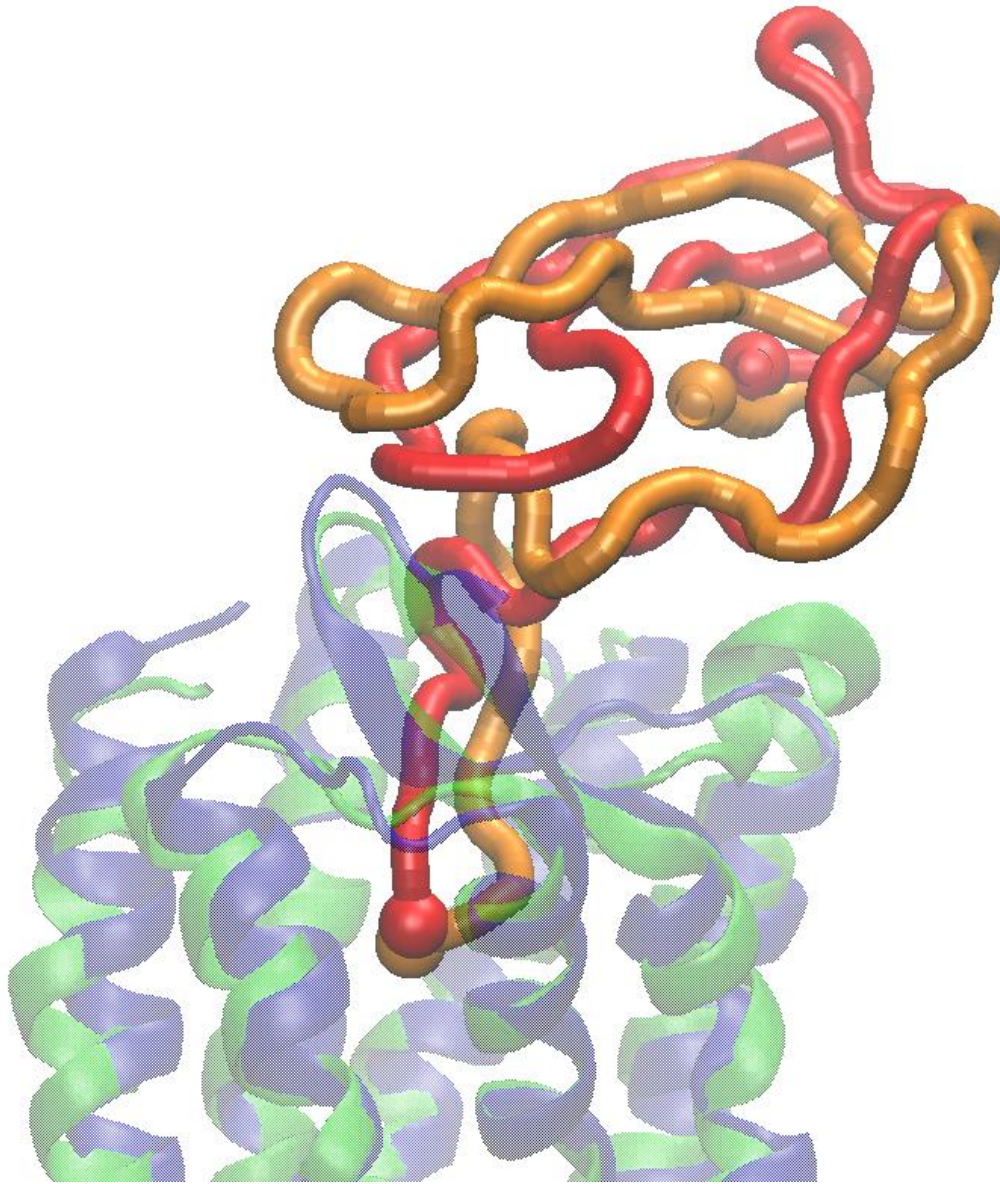

**Supplementary Figure 2A:** Superimposed molecular graphics images of CCL5 in complex with CCR5 and CXCL2 in complex with CXCR4<sup>14</sup>. The structures correspond to the final simulation snapshots of CXCL2 in complex with CXCR4<sup>14</sup> and CCL5 in complex with CCR5 (Complex 14A in this work). CXCL12 is shown in red color, CXCR4 is shown in blue color, CCL5 is shown in orange color, and CCR5 is shown in green color. The N-terminal domains of the chemokine receptors are not presented for clarity. Only the principal interacting chemokine residue domains 1-48 are presented. The C $\alpha$  atoms of chemokine residues 1 (bottom) and 48 (top) are shown in van der Waals spheres.



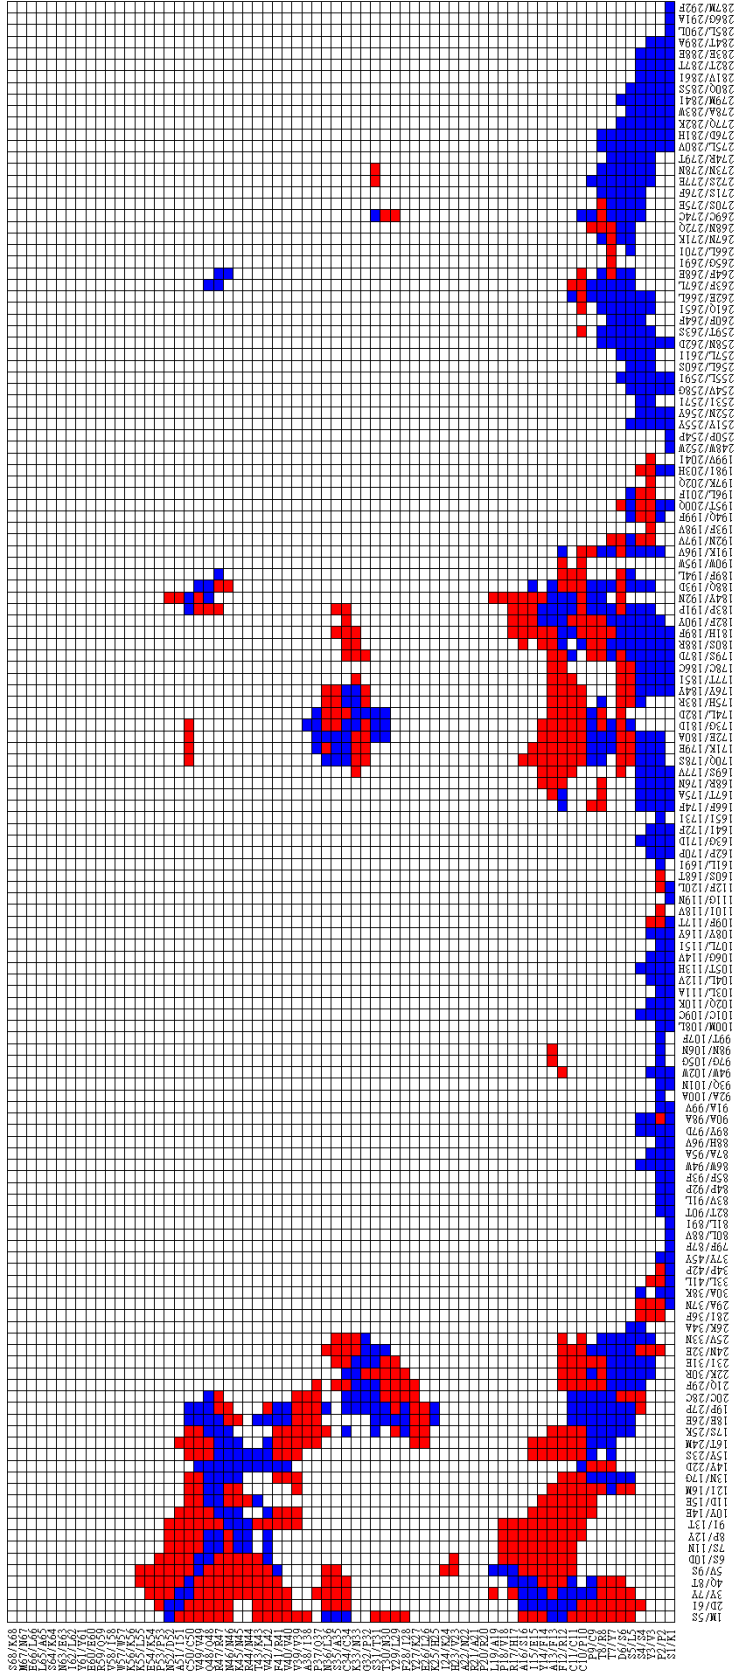

**Supplementary Figure 2B:** Two dimensional density map depicting the CCL5 / CXCL12 (y axis) Cα : CCR5 / CXCR4 (x axis) Cα residue pairs which are located on the protein binding interface in the final simulation snapshots of CCL5 : CCR5 and CXCL12 : CXCR4<sup>14</sup>. A blue color denotes that the Cα : Cα distance for the specific residue pair is similar (< 4Å) in the two complexes, whereas a red color denotes that the distance is not similar (> 4Å). Residue pairs which are denoted in white color are not part of the binding interface.

*Supplementary Tables:*

**Supplementary Table 1**

Hydrogen bond percentage (%) occupancies of important intermolecular hydrogen-bonding atom pairs within the Complex 14A simulation.

| CCL5 Residue | Number | Group | Atom | CCR5 Residue | Number | Group | Atom | Occupancy (%) |
|--------------|--------|-------|------|--------------|--------|-------|------|---------------|
| SER          | 1      | Main  | N    | GLN          | 280    | Side  | OE1  | 100           |
| SER          | 1      | Main  | N    | GLN          | 280    | Side  | NE2  | 9.29          |
| SER          | 1      | Main  | N    | GLN          | 280    | Side  | NE2  | 9.29          |
| SER          | 1      | Main  | N    | GLU          | 283    | Side  | OE1  | 99.9          |
| SER          | 1      | Main  | N    | GLU          | 283    | Side  | OE2  | 97.9          |
| SER          | 1      | Side  | OG   | TYR          | 251    | Side  | OH   | 95.7          |
| SER          | 1      | Side  | OG   | MET          | 279    | Side  | SD   | 19.58         |
| TYR          | 3      | Side  | OH   | THR          | 167    | Side  | OG1  | 82.92         |
| SER          | 4      | Main  | O    | LYS          | 191    | Side  | NZ   | 46.25         |
| SER          | 4      | Side  | OG   | LYS          | 22     | Side  | NZ   | 35.26         |
| SER          | 4      | Side  | OG   | ASP          | 276    | Side  | OD1  | 55.54         |
| SER          | 4      | Side  | OG   | ASP          | 276    | Side  | OD2  | 32.57         |
| SER          | 5      | Main  | O    | LYS          | 22     | Side  | NZ   | 96.1          |
| SER          | 5      | Main  | N    | ASN          | 258    | Side  | OD1  | 60.64         |
| SER          | 5      | Main  | N    | ASN          | 258    | Side  | ND2  | 20.78         |
| SER          | 5      | Side  | OG   | LYS          | 22     | Side  | NZ   | 38.46         |
| SER          | 5      | Side  | OG   | ASN          | 258    | Side  | OD1  | 15.88         |
| SER          | 5      | Side  | OG   | SER          | 272    | Main  | O    | 15.48         |
| SER          | 5      | Side  | OG   | SER          | 272    | Side  | OG   | 63.14         |
| ASP          | 6      | Main  | O    | MET          | 1      | Main  | N    | 11.39         |
| ASP          | 6      | Main  | N    | GLU          | 262    | Side  | OE2  | 63.94         |
| ASP          | 6      | Main  | N    | GLU          | 262    | Side  | OE1  | 57.44         |
| ASP          | 6      | Side  | OD1  | SER          | 179    | Side  | OG   | 7.79          |
| ASP          | 6      | Side  | OD2  | LYS          | 191    | Side  | NZ   | 77.72         |
| ASP          | 6      | Side  | OD1  | LYS          | 191    | Side  | NZ   | 55.24         |
| THR          | 7      | Main  | N    | ASP          | 2      | Side  | OD2  | 63.44         |
| THR          | 7      | Main  | N    | ASP          | 2      | Side  | OD1  | 11.49         |
| THR          | 7      | Main  | O    | LYS          | 22     | Main  | N    | 92.81         |
| THR          | 7      | Side  | OG1  | ASP          | 2      | Side  | OD2  | 25.17         |
| THR          | 7      | Side  | OG1  | SER          | 272    | Side  | OG   | 57.64         |
| THR          | 8      | Main  | O    | MET          | 1      | Main  | N    | 81.92         |
| THR          | 8      | Side  | OG1  | GLN          | 21     | Side  | NE2  | 31.17         |
| THR          | 8      | Side  | OG1  | LYS          | 22     | Main  | O    | 8.29          |
| THR          | 8      | Side  | OG1  | ASN          | 24     | Side  | OD1  | 10.49         |

|     |    |      |     |     |     |      |     |       |
|-----|----|------|-----|-----|-----|------|-----|-------|
| THR | 8  | Side | OG1 | ASN | 24  | Side | ND2 | 7.99  |
| PRO | 9  | Main | O   | MET | 1   | Main | N   | 13.99 |
| CYS | 10 | Main | O   | MET | 1   | Main | N   | 81.32 |
| PHE | 12 | Main | N   | TYS | 3   | Side | OS3 | 94.71 |
| PHE | 12 | Main | N   | TYS | 3   | Side | OS2 | 68.63 |
| PHE | 12 | Main | O   | GLN | 170 | Side | NE2 | 46.05 |
| PHE | 12 | Main | O   | LYS | 171 | Main | N   | 16.28 |
| ALA | 13 | Main | N   | TYS | 3   | Side | OS3 | 95.4  |
| TYR | 14 | Main | N   | TYS | 3   | Side | OS3 | 99.9  |
| ALA | 16 | Main | N   | TYR | 184 | Main | O   | 54.85 |
| ARG | 17 | Side | NH1 | TYR | 187 | Side | OH  | 38.06 |
| LYS | 25 | Side | NZ  | TYS | 14  | Side | OS4 | 23.88 |
| LYS | 25 | Side | NZ  | TYS | 14  | Side | OS3 | 22.68 |
| LYS | 25 | Side | NZ  | TYS | 14  | Side | OS2 | 20.28 |
| SER | 31 | Side | OG  | GLN | 21  | Side | OE1 | 32.17 |
| SER | 31 | Side | OG  | GLN | 21  | Side | NE2 | 13.59 |
| LYS | 33 | Main | O   | ASN | 24  | Side | ND2 | 17.58 |
| LYS | 33 | Side | NZ  | GLN | 21  | Side | OE1 | 12.29 |
| LYS | 33 | Side | NZ  | ASN | 24  | Side | OD1 | 7.49  |
| SER | 35 | Main | N   | GLY | 173 | Main | O   | 81.62 |
| SER | 35 | Side | OG  | LYS | 171 | Side | NZ  | 67.03 |
| SER | 35 | Side | OG  | GLY | 173 | Main | O   | 41.46 |
| ASN | 36 | Side | OD1 | LYS | 171 | Side | NZ  | 22.18 |
| ARG | 44 | Side | NH1 | TYR | 187 | Side | OH  | 89.71 |
| ARG | 44 | Side | NH2 | TYR | 187 | Side | OH  | 29.47 |
| LYS | 45 | Side | NZ  | ASP | 11  | Side | OD1 | 43.16 |
| LYS | 45 | Side | NZ  | ASP | 11  | Side | OD2 | 22.48 |
| ASN | 46 | Main | N   | TYS | 14  | Side | OS2 | 8.69  |
| ASN | 46 | Main | N   | TYS | 14  | Side | OS4 | 7.69  |
| ASN | 46 | Main | N   | TYS | 14  | Side | OS3 | 7.69  |
| ASN | 46 | Side | ND2 | ASP | 11  | Main | O   | 9.59  |
| ASN | 46 | Side | ND2 | TYS | 14  | Side | OS3 | 14.89 |
| ASN | 46 | Side | ND2 | TYS | 14  | Side | OS2 | 14.39 |
| ASN | 46 | Side | ND2 | TYS | 14  | Side | OS4 | 12.99 |
| ASN | 46 | Side | ND2 | TYR | 15  | Side | OH  | 59.54 |
| ARG | 47 | Main | N   | TYS | 14  | Side | OS2 | 26.47 |
| ARG | 47 | Main | N   | TYS | 14  | Side | OS4 | 26.27 |
| ARG | 47 | Main | N   | TYS | 14  | Side | OS3 | 25.37 |
| ARG | 47 | Side | NE  | GLN | 4   | Main | O   | 100   |
| ARG | 47 | Side | NH2 | GLN | 4   | Main | O   | 79.22 |
| GLN | 48 | Side | NE2 | TYS | 14  | Side | OS2 | 15.68 |

|     |    |      |     |     |    |      |     |       |
|-----|----|------|-----|-----|----|------|-----|-------|
| GLN | 48 | Side | NE2 | TYS | 14 | Side | OS3 | 12.49 |
| GLN | 48 | Side | NE2 | TYS | 14 | Side | OS4 | 10.59 |
| GLN | 48 | Side | NE2 | GLU | 18 | Side | OE1 | 12.99 |
| GLN | 48 | Side | NE2 | GLU | 18 | Side | OE2 | 9.29  |
| CYS | 50 | Main | N   | TYS | 3  | Side | OS4 | 100   |

We sort the hydrogen bonding atom pairs, firstly, with respect to the residue number of the CCL5 atom, and secondly, the residue number of the CCR5 atom. All values have been computed by analysis of 1000 snapshots (per complex), extracted from the 20-ns of Complex 14 A, at 20-ps intervals. A hydrogen bond was present if the donor (D)–acceptor (A) distance was less than 3.5 Å and the corresponding angle (D–H ⋯ A) was larger than 90°. Hydrogen bond interactions associated with salt-bridge formation are consecutively highlighted in yellow background. Hydrogen bonding atom pairs with less than 8% occupancy are not reported.

## Supplementary Table 2

Binding free energies using the GBSA and MM GBSA approximations for CCL5 : CCR5 complexes.

|                | Docking and Minimization <sup>¶</sup> |       |        | MD Simulations <sup>†</sup> |               |                      |
|----------------|---------------------------------------|-------|--------|-----------------------------|---------------|----------------------|
|                | GBSA                                  |       |        | MM GBSA                     |               |                      |
|                | Non-Polar                             | Polar | Total  | Non- polar                  | Polar         | Total                |
| 1 <sup>§</sup> | -157.0                                | -13.3 | -170.4 | -239.6 (9.5)                | -69.2 (10.0)  | -308.8 (10.6)        |
| 2              | -145.0                                | -15.7 | -160.7 | -254.5 (12.3)               | -57.7 (12.2)  | -312.2 (16.1)        |
| 3              | -130.0                                | -28.0 | -158.0 | -218.2 (12.3)               | -69.0 (11.5)  | -287.2 (11.5)        |
| 4              | -152.3                                | -5.6  | -157.9 | -262.2 (18.2)               | -63.1 (12.9)  | -325.3 (18.2)        |
| 5              | -146.1                                | -11.0 | -157.1 | -227.6 (9.1)                | -88.9 (11.5)  | -316.5 (12.9)        |
| 6              | -136.4                                | -18.0 | -154.4 | -223.6 (8.8)                | -79.5 (13.6)  | -303.1 (14.0)        |
| 7              | -129.9                                | -23.6 | -153.5 | -218.7 (10.4)               | -53.9 (8.9)   | -272.6 (10.9)        |
| 8              | -132.0                                | -20.0 | -152.1 | -233.9 (8.8)                | -75.9 (11.9)  | -309.7 (12.8)        |
| 9              | -138.7                                | -13.0 | -151.8 | -215.0 (8.2)                | -75.9 (13.3)  | -290.9 (14.0)        |
| 10             | -130.2                                | -19.8 | -150.0 | -213.0 (11.0)               | -71.7 (11.3)  | -284.7 (12.6)        |
| 11             | -153.7                                | 4.0   | -149.7 | -205.4 (9.8)                | -79.9 (12.5)  | -285.1 (11.9)        |
| 12             | -138.5                                | -11.1 | -149.6 | -245.0 (8.9)                | -85.6 (12.9)  | -330.7 (13.4)        |
| 13             | -115.0                                | -33.2 | -148.3 | -237.6 (7.3)                | -79.3 (9.8)   | -316.8 (9.5)         |
| 14             | -129.4                                | -18.6 | -148.0 | -242.2 (11.4)               | -103.9 (12.3) | -346.1 (16.0)        |
| 15             | -141.8                                | -6.2  | -148.0 | -233.3 (8.4)                | -30.0 (9.5)   | -263.3 (10.6)        |
| 16             | -124.5                                | -23.2 | -147.6 | -218.0 (9.2)                | -58.4 (10.7)  | -276.4 (13.2)        |
| 17             | -125.0                                | -22.6 | -147.6 | -249.7 (8.4)                | -90.4 (11.7)  | -340.1 (11.2)        |
| 18             | -135.4                                | -11.9 | -147.4 | -220.9 (9.4)                | -74.6 (12.7)  | -295.4 (13.3)        |
| 19             | -130.5                                | -16.7 | -147.2 | -253.4 (8.7)                | -67.8 (11.4)  | -321.2 (11.1)        |
| 20             | -123.3                                | -23.8 | -147.1 | -230.8 (9.8)                | -71.2 (12.1)  | -302.0 (11.5)        |
| 21             | -123.7                                | -23.4 | -147.1 | -224.0 (9.3)                | -80.0 (11.9)  | -304.0 (11.4)        |
| 22             | -122.4                                | -24.4 | -146.7 | -193.8 (8.1)                | -72.7 (10.8)  | -266.5 (9.7)         |
| 23             | -125.6                                | -21.0 | -146.6 | -223.0 (8.1)                | -46.8 (11.9)  | -269.8 (12.4)        |
| 24             | -152.2                                | 5.6   | -146.6 | -259.4 (8.0)                | -49.9 (10.8)  | -309.3 (9.5)         |
| 25             | -146.9                                | 0.5   | -146.5 | -220.4 (7.4)                | -71.5 (9.8)   | -291.9 (10.0)        |
| 14A            | ---                                   | ---   | ---    | -244.2 (8.3)                | -105.9 (10.5) | <b>-350.1</b> (11.0) |
| 17A            | ---                                   | ---   | ---    | -253.5 (8.5)                | -83.7 (11.2)  | -337.1 (12.2)        |

The binding free energies (kcal/mol) are calculated as described in Methods. The numbering<sup>§</sup> (1-25) is sorted according to the total binding free energy, using the GBSA approximation, of the docked complexes after minimization, referred as step 4<sup>¶</sup>; the total binding free energy is the sum of non-polar and polar contributions of step 4. The MD simulation<sup>†</sup> results correspond to the

average binding free energies of the 25 complexes, based on 30-ns MD simulation runs, as well as the additional simulations “14A” and “17A”, based on 20-ns MD simulation runs, referred as steps 5 and 6, respectively. The values were calculated using the MM GBSA approximation, decomposed into non-polar and polar contributions of step 6. The standard deviation is shown in parentheses. Complexes 14 and 17 are highlighted in gray background as they possess the lowest binding free energy from all 25 Complexes. Complex 14A is also highlighted as it possesses the lowest binding free energy among all complexes; also, the total binding free energy of simulation “14A” is shown in **bold** face. All MD simulation values have been computed by analysis of 1000 snapshots, extracted from the last 20-ns simulations (of all complexes), at 20-ps intervals.

### Supplementary Coordinates

The MD coordinates of the final simulation, extracted every 2-ns are provided as Supplementary Coordinates in PDB format. The structures are aligned with regard to the backbone of the CCR5 transmembrane helical region. The correspondence of PDB files and time in the MD simulation is as follows:

| PDB file         | Time (ns) |
|------------------|-----------|
| ccl5_ccr5.1.pdb  | 2         |
| ccl5_ccr5.2.pdb  | 4         |
| ccl5_ccr5.3.pdb  | 6         |
| ccl5_ccr5.4.pdb  | 8         |
| ccl5_ccr5.5.pdb  | 10        |
| ccl5_ccr5.6.pdb  | 12        |
| ccl5_ccr5.7.pdb  | 14        |
| ccl5_ccr5.8.pdb  | 16        |
| ccl5_ccr5.9.pdb  | 18        |
| ccl5_ccr5.10.pdb | 20        |

### Supplementary Video

A video demonstrating the final simulation trajectory of CCL5 : CCR5, and depicting the gradual stabilization and preservation of the key salt bridges, important hydrogen bonds and important cation- $\pi$  interactions, which are shown in Figure 2, is provided as Supplementary Information.

## Supplementary References

---

- <sup>1</sup> Schnur, E. et al. NMR mapping of RANTES surfaces interacting with CCR5 using linked extracellular domains. *FEBS J.* 280, 2068-2084 (2013).
- <sup>2</sup> Schnur, E. et al. The conformation and orientation of a 27-residue CCR5 peptide in a ternary complex with HIV-1 gp120 and a CD4-mimic peptide. *J Mol Biol.* 410, 778-797 (2011).
- <sup>3</sup> Tamamis, P. & Floudas, C. A. Molecular recognition of CCR5 by an HIV-1 gp120 V3 loop. *PLoS ONE* 9(4): e95767 (2014).
- <sup>4</sup> Chung, C. W., Cooke, R. M., Proudfoot, A. E. & Wells, T. N. The three-dimensional solution structure of RANTES. *Biochemistry.* 34, 9307-9314 (1995).
- <sup>5</sup> Wang, X., Watson, C., Sharp, J. S., Handel, T. M. & Prestegard, J. H. Oligomeric structure of the chemokine CCL5/RANTES from NMR, MS, and SAXS data. *Structure.* 19, 1138-1148 (2011).
- <sup>6</sup> Choi, W. T. et al. CCR5 mutations distinguish N-terminal modifications of RANTES (CCL5) with agonist versus antagonist activity. *J. Virol.* 86, 10218-10220 (2012).
- <sup>7</sup> Proudfoot, A. E. et al. Extension of recombinant human RANTES by the retention of the initiating methionine produces a potent antagonist. *J. Biol. Chem.* 271, 2599-2603 (1996).
- <sup>8</sup> Govaerts, C. et al. Activation of CCR5 by chemokines involves an aromatic cluster between transmembrane helices 2 and 3. *J Biol Chem.* 278, 1892-1903 (2003).
- <sup>9</sup> Kondru, R. et al. Molecular interactions of CCR5 with major classes of small-molecule anti-HIV CCR5 antagonists. *Mol Pharmacol.* 73, 789-800 (2008).
- <sup>10</sup> Blanpain, C. et al. The core domain of chemokines binds CCR5 extracellular domains while their amino terminus interacts with the transmembrane helix bundle. *J. Biol. Chem.* 278, 5179-5187 (2003).
- <sup>11</sup> Maeda, K., Das, D., Ogata-Aoki, H., Nakata, H., Miyakawa, T., Tojo, Y., Norman, R., Takaoka, Y., Ding, J., Arnold, G. F., Arnold, E. & Mitsuya, H. Structural and molecular interactions of CCR5 inhibitors with CCR5. *J. Biol. Chem.* 281, 12688-12698 (2006).
- <sup>12</sup> Tan, Q., Zhu, Y., Li, J., Chen, Z., Han, G. W., Kufareva, I., Li, T., Ma, L., Fenalti, G., Li, J., Zhang, W., Xie, X., Yang, H., Jiang, H., Cherezov, V., Liu, H., Stevens, R. C., Zhao, Q. & Wu, B. Structure of the CCR5 chemokine receptor-HIV entry inhibitor maraviroc complex. *Science.* 341, 1387-1390 (2013).



- 
- <sup>13</sup> Tamamis, P. & Floudas, C. A. Molecular recognition of CXCR4 by a dual tropic HIV-1 gp120 V3 loop. *Biophys J.* 105, 1502-1514 (2013).
- <sup>14</sup> Tamamis, P. & Floudas, C. A. Elucidating a Key Component of Cancer Metastasis: CXCL12 (SDF-1 $\alpha$ ) Binding to CXCR4. *J. Chem. Inf. Model.* 54 (4), 1174-1188 (2014).
- <sup>15</sup> Tamamis, P., Morikis, D., Floudas, C. A. & Archontis, G. Species specificity of the complement inhibitor compstatin investigated by all-atom molecular dynamics simulations. *Proteins.* 78, 2655-2667 (2010).
- <sup>16</sup> Tamamis, P. et al. Design of a modified mouse protein with ligand binding properties of its human analog by molecular dynamics simulations: the case of C3 inhibition by compstatin. *Proteins.* 79, 3166-3179 (2011).
- <sup>17</sup> Tamamis, P. et al. Molecular dynamics in drug design: new generations of compstatin analogs. *Chem. Biol. Drug. Des.* 79, 703-718 (2012).
- <sup>18</sup> Gorham, R. D. et al. Novel compstatin family peptides inhibit complement activation by drusen-like deposits in human retinal pigmented epithelial cell cultures. *Exp. Eye. Res.* 116, 96-108 (2013).
- <sup>19</sup> Kieslich, C. A. et al. Exploring protein-protein and protein-ligand interactions in the immune system using molecular dynamics and continuum electrostatics. *Current Physical Chemistry.* 2, 324-343 (2012).
- <sup>20</sup> Im, W., Feig, M. & Brooks, C. L. III. An implicit membrane generalized born theory for the study of structure, stability and interactions of membrane proteins. *Biophys. J.* 85, 2900-2918 (2003).
